# Supplementary material
Source: publisher figshare collection journal article supplement (https://karger.figshare.com/articles/dataset/_/5241727)
Supplement: Supplementary file 2 [file 1]

The correct affiliations of the article: 'Management of von Hippel-Lindau Disease: An Interdisciplinary Review' (Oncol Res Treat 2014;37:761–771; DOI:10.1159/000369362) are:

Sabine Schmid<sup>a</sup> Silke Gillessen<sup>a</sup> Isabelle Binet<sup>b</sup>  
Michael Brändle<sup>c</sup> Daniel Engeler<sup>d</sup> Jeannette Greiner<sup>e</sup>  
Claudia Hader<sup>f</sup> Karl Heinimann<sup>g</sup> Patrik Kloos<sup>h</sup> Willy Krek<sup>i</sup>  
Ina Krull<sup>c</sup> Sandro J. Stoeckli<sup>j</sup> Michael C. Sulz<sup>k</sup>  
Karin van Leyen<sup>l</sup> Johannes Weber<sup>f</sup> Christian Rothermundt<sup>a</sup>  
Thomas Hundsberger<sup>a,m</sup>

<sup>a</sup> Division of Haematology and Oncology, Cantonal Hospital St. Gallen, Switzerland

<sup>b</sup> Division of Nephrology and Transplantation Medicine, Cantonal Hospital St. Gallen, Switzerland

<sup>c</sup> Department of Endocrinology, Diabetology and Osteology, Cantonal Hospital St. Gallen, Switzerland

<sup>d</sup> Department of Urology, Cantonal Hospital St. Gallen, Switzerland

<sup>e</sup> Department of Haematology and Oncology, Children's Hospital of Eastern Switzerland, St. Gallen, Switzerland

<sup>f</sup> Department of Radiology, Cantonal Hospital St. Gallen, Switzerland

<sup>g</sup> Medical Genetics, University Hospital Basel, Switzerland

<sup>h</sup> Augenzentrum und Tagesklinik Wil, Switzerland

<sup>i</sup> Institute of Molecular Health Sciences, ETH Zürich, Switzerland

<sup>j</sup> Department of Otorhinolaryngology, Head and Neck Surgery, Cantonal Hospital St. Gallen, Switzerland

<sup>k</sup> Department of Gastroenterology and Hepatology, Cantonal Hospital St. Gallen, Switzerland

<sup>l</sup> Department of Neurosurgery, Cantonal Hospital St. Gallen, Switzerland

<sup>m</sup> Department of Neurology, Cantonal Hospital, St. Gallen, Switzerland
